# Supplementary material for: High-throughput screening of polymeric dispersants to accelerate the development of stable pigment dispersions
Source: Royal Society of Chemistry journal article supplement (doi:10.1039/b711899f), 2007-10-31
Supplement: b711899f.pdf [file b711899f.pdf]

Supporting Information: Summary of the composition and analytical results for polymers used.

|     | wt-% (monomer feed) |     |     |      |             |             |             |             | Yield     |           | wt-% (1H NMR) |     |     |      |             |             |             |             | GPC results |         |       | Dispersion data |         |
|-----|---------------------|-----|-----|------|-------------|-------------|-------------|-------------|-----------|-----------|---------------|-----|-----|------|-------------|-------------|-------------|-------------|-------------|---------|-------|-----------------|---------|
|     | MAA                 | MMA | BMA | EHMA | PEGMA (144) | PEGMA (300) | PEGMA (475) | PEGMA(1100) | yield (g) | yield (%) | MAA           | MMA | BMA | EHMA | PEGMA (144) | PEGMA (300) | PEGMA (475) | PEGMA(1100) | Mn          | Mw      | Mw/Mn | APD (nm)        | API (%) |
| A1  | 10                  | 90  |     |      |             |             |             | 2.9         | 97        | 10        | 90            |     |     |      |             |             |             |             | 21,900      | 68,700  | 3.137 | 1000            | 125     |
| A2  | 20                  | 80  |     |      |             |             |             | 3.13        | 104       | 19        | 81            |     |     |      |             |             |             |             | 25,500      | 55,000  | 2.157 | 89.1            | 11      |
| A3  | 30                  | 70  |     |      |             |             |             | 3.2         | 107       | 29        | 71            |     |     |      |             |             |             |             | 31,000      | 76,900  | 2.481 | 93.5            | 12      |
| A4  | 40                  | 60  |     |      |             |             |             | 3.34        | 111       | 39        | 61            |     |     |      |             |             |             |             | 96,200      | 158,400 | 1.647 | 119             | 15      |
| A5  | 10                  |     | 90  |      |             |             |             | 2.7         | 90        | 11        |               | 89  |     |      |             |             |             |             | 20,100      | 65,900  | 3.279 | 1000            | 125     |
| A6  | 20                  |     | 80  |      |             |             |             | 2.77        | 92        | 19        |               | 81  |     |      |             |             |             |             | 23,400      | 54,500  | 2.329 | 169             | 21      |
| A7  | 30                  |     | 70  |      |             |             |             | 3.11        | 104       | 30        |               | 70  |     |      |             |             |             |             | 33,100      | 80,100  | 2.420 | 83.5            | 10      |
| A8  | 40                  |     | 60  |      |             |             |             | 3.34        | 111       | 42        |               | 58  |     |      |             |             |             |             | 72,700      | 135,200 | 1.860 | 115             | 14      |
| A9  | 10                  |     |     | 90   |             |             |             | 2.7         | 90        | 11        |               |     | 89  |      |             |             |             |             | 33,400      | 103,700 | 3.105 | 1000            | 125     |
| A10 | 20                  |     |     | 80   |             |             |             | 2.91        | 97        | 20        |               |     | 80  |      |             |             |             |             | 38,400      | 127,500 | 3.320 | 326             | 41      |
| A11 | 30                  |     |     | 70   |             |             |             | 3.12        | 104       | 31        |               |     | 69  |      |             |             |             |             | 47,200      | 126,800 | 2.686 | 95.6            | 12      |
| A12 | 40                  |     |     | 60   |             |             |             | 3.06        | 102       | 39        |               |     | 61  |      |             |             |             |             | 43,900      | 132,400 | 3.016 | 118             | 15      |
| B1  | 10                  | 90  |     |      |             |             |             | 2.995       | 100       | 6         | 94            |     |     |      |             |             |             |             | 21,100      | 52,600  | 2.493 | 1000            | 96      |
| B2  | 12                  | 88  |     |      |             |             |             | 2.995       | 100       | 9         | 91            |     |     |      |             |             |             |             | 21,000      | 56,500  | 2.690 | 421             | 65      |
| B3  | 14                  | 86  |     |      |             |             |             | 2.671       | 89        | 7         | 93            |     |     |      |             |             |             |             | 21,100      | 55,000  | 2.607 | 140             | 62      |
| B4  | 16                  | 84  |     |      |             |             |             | 2.309       | 77        | 11        | 89            |     |     |      |             |             |             |             | 22,500      | 59,200  | 2.631 | 125             | 51      |
| B5  | 18                  | 82  |     |      |             |             |             | 2.299       | 77        | 12        | 88            |     |     |      |             |             |             |             | 18,400      | 51,600  | 2.804 | 149             | 59      |
| B6  | 20                  | 80  |     |      |             |             |             | 2.161       | 72        | 14        | 86            |     |     |      |             |             |             |             | 20,400      | 48,500  | 2.377 | 139             | 56      |
| B7  | 22                  | 78  |     |      |             |             |             | 0.898       | 30        | 14        | 86            |     |     |      |             |             |             |             | 26,200      | 59,700  | 2.279 | 164             | 57      |
| B8  | 24                  | 76  |     |      |             |             |             | 0.866       | 29        | 15        | 85            |     |     |      |             |             |             |             | 31,600      | 68,400  | 2.165 | 160             | 53      |
| B9  | 26                  | 74  |     |      |             |             |             | 0.856       | 29        | 17        | 83            |     |     |      |             |             |             |             | 27,000      | 67,900  | 2.515 | 159             | 48      |
| B10 | 28                  | 72  |     |      |             |             |             | 0.916       | 31        | 19        | 81            |     |     |      |             |             |             |             | 24,300      | 63,500  | 2.613 | 225             | 61      |
| B11 | 30                  | 70  |     |      |             |             |             | 1.348       | 45        | 22        | 78            |     |     |      |             |             |             |             | 22,900      | 60,900  | 2.659 | 222             | 57      |
| B12 | 32                  | 68  |     |      |             |             |             | 1.304       | 43        | 26        | 74            |     |     |      |             |             |             |             | 26,000      | 64,400  | 2.477 | 227             | 61      |
| C1  | 10                  | 90  |     |      |             |             |             | 2.66        | 89        | 10        | 90            |     |     |      |             |             |             |             | 18,900      | 64,300  | 3.402 | 1000            | 85      |
| C2  | 12                  | 88  |     |      |             |             |             | 2.613       | 87        | 12        | 88            |     |     |      |             |             |             |             | 19,600      | 63,300  | 3.230 | 1000            | 47      |
| C3  | 14                  | 86  |     |      |             |             |             | 2.747       | 92        | 14        | 86            |     |     |      |             |             |             |             | 29,200      | 77,300  | 2.647 | 130             | 16      |
| C4  | 16                  | 84  |     |      |             |             |             | 2.726       | 91        | 16        | 84            |     |     |      |             |             |             |             | 25,000      | 72,400  | 2.896 | 105             | 18      |
| C5  | 18                  | 82  |     |      |             |             |             | 2.68        | 89        | 19        | 81            |     |     |      |             |             |             |             | 27,800      | 77,100  | 2.773 | 99.9            | 16      |
| C6  | 20                  | 80  |     |      |             |             |             | 2.64        | 88        | 22        | 78            |     |     |      |             |             |             |             | 22,800      | 67,300  | 2.952 | 101             | 16      |
| C7  | 22                  | 78  |     |      |             |             |             | 2.511       | 84        | 24        | 76            |     |     |      |             |             |             |             | 22,900      | 61,100  | 2.668 | 97.2            | 16      |
| C8  | 24                  | 76  |     |      |             |             |             | 2.695       | 90        | 26        | 74            |     |     |      |             |             |             |             | 21,400      | 59,200  | 2.766 | 95.8            | 13      |
| C9  | 26                  | 74  |     |      |             |             |             | 2.29        | 76        | 28        | 72            |     |     |      |             |             |             |             | 20,500      | 63,700  | 3.107 | 110             | 14      |
| C10 | 28                  | 72  |     |      |             |             |             | 2.42        | 81        | 31        | 69            |     |     |      |             |             |             |             | 29,400      | 70,800  | 2.408 | 121             | 16      |
| C11 | 30                  | 70  |     |      |             |             |             | 2.209       | 74        | 33        | 67            |     |     |      |             |             |             |             | 26,100      | 65,000  | 2.490 | 124             | 14      |
| C12 | 32                  | 68  |     |      |             |             |             | 2.348       | 78        | 35        | 65            |     |     |      |             |             |             |             | 21,000      | 61,700  | 2.938 | 127             | 18      |
| D1  | 16                  | 79  |     | 5    |             |             |             | 2.509       | 84        | 12        | 83            |     | 5   |      |             |             |             |             | 21,800      | 63,100  | 2.894 | 189             | 24      |
| D2  | 16                  | 74  |     | 10   |             |             |             | 2.404       | 80        | 11        | 78            |     | 10  |      |             |             |             |             | 21,500      | 60,100  | 2.795 | 144             | 27      |
| D3  | 16                  | 64  |     | 20   |             |             |             | 2.564       | 85        | 11        | 65            |     | 23  |      |             |             |             |             | 25,700      | 65,000  | 2.529 | 141             | 19      |
| D4  | 16                  | 79  |     |      | 5           |             |             | 2.651       | 88        | 10        | 85            |     |     | 5    |             |             |             |             | 21,800      | 66,900  | 3.069 | 141             | 12      |
| D5  | 16                  | 74  |     |      | 10          |             |             | 2.607       | 87        | 12        | 77            |     |     | 11   |             |             |             |             | 24,500      | 78,600  | 3.208 | 133             | 16      |
| D6  | 16                  | 64  |     |      | 20          |             |             | 2.569       | 86        | 10        | 67            |     |     | 23   |             |             |             |             | 26,200      | 79,400  | 3.031 | 129             | 23      |
| D7  | 16                  | 79  |     |      |             | 5           |             | 2.737       | 91        | 10        | 84            |     |     |      | 7           |             |             |             | 19,800      | 47,500  | 2.399 | 109             | 11      |
| D8  | 16                  | 74  |     |      |             | 10          |             | 2.504       | 83        | 11        | 79            |     |     |      | 11          |             |             |             | 20,000      | 38,700  | 1.935 | 109             | 21      |
| D9  | 16                  | 64  |     |      |             | 20          |             | 2.666       | 89        | 10        | 67            |     |     |      | 23          |             |             |             | 14,500      | 25,100  | 1.731 | 143             | 17      |
| D10 | 16                  | 79  |     |      |             |             | 5           | 2.511       | 84        | 14        | 79            |     |     |      |             | 7           |             |             | 17,600      | 33,500  | 1.903 | 205             | 55      |
| D11 | 16                  | 74  |     |      |             |             | 10          | 2.293       | 76        | 14        | 76            |     |     |      |             |             | 10          |             | 10,100      | 20,200  | 2.000 | 94.1            | 7       |
| D12 | 16                  | 64  |     |      |             |             | 20          | 1.576       | 53        | 14        | 64            |     |     |      |             |             | 22          |             | 7,700       | 13,100  | 1.701 | 151             | 43      |
| E1  | 16                  | 74  |     |      |             |             | 10          | 1.888       | 63        | 15        | 69            |     |     |      |             |             |             | 16          | 12,800      | 24,000  | 1.875 | 302             | 70      |
| E2  | 18                  | 72  |     |      |             |             |             | 2.369       | 79        | 17        | 70            |     |     |      |             |             |             | 14          | 13,100      | 25,700  | 1.962 | 156             | 36      |
| E3  | 20                  | 70  |     |      |             |             |             | 1.134       | 38        | 19        | 65            |     |     |      |             |             |             | 16          | 8,700       | 17,600  | 2.023 | 208             | 9       |
| E4  | 22                  | 68  |     |      |             |             |             | 2.301       | 77        | 20        | 65            |     |     |      |             |             |             | 15          | 11,800      | 22,900  | 1.941 | 104             | 6       |
| E5  | 24                  | 66  |     |      |             |             |             | 2.306       | 77        | 22        | 63            |     |     |      |             |             |             | 16          | 12,800      | 26,600  | 2.078 | 88.6            | 6       |
| E6  | 26                  | 64  |     |      |             |             |             | 2.587       | 86        | 25        | 60            |     |     |      |             |             |             | 15          | 11,400      | 23,500  | 2.061 | 151             | 7       |
| E7  | 16                  | 79  |     |      |             |             | 5           | 2.661       | 89        | 15        | 77            |     |     |      |             |             |             |             | 23,500      | 51,300  | 2.183 | 502             | 31      |
| E8  | 18                  | 77  |     |      |             |             | 5           | 2.608       | 87        | 17        | 75            |     |     |      |             |             |             |             | 19,000      | 52,300  | 2.753 | 206             | 53      |
| E9  | 20                  | 75  |     |      |             |             | 5           | 2.685       | 90        | 19        | 74            |     |     |      |             |             |             |             | 20,500      | 52,500  | 2.561 | 196             | 42      |
| E10 | 22                  | 73  |     |      |             |             | 5           | 2.653       | 88        | 22        | 71            |     |     |      |             |             |             |             | 20,300      | 48,600  | 2.394 | 77.9            | 8       |
| E11 | 24                  | 71  |     |      |             |             | 5           | 2.515       | 84        | 24        | 69            |     |     |      |             |             |             |             | 19,800      | 49,300  | 2.490 | 98.2            | 9       |
| E12 | 26                  | 69  |     |      |             |             | 5           | 2.611       | 87        | 28        | 65            |     |     |      |             |             |             |             | 21,400      | 47,500  | 2.220 | 90.4            | 5       |
